# Supplementary material for: Enhanced photoluminescence stability of CdS nanocrystals through a zinc acetate reagent
Source: Royal Society of Chemistry journal article supplement (doi:10.1039/c8ra03504k), 2018-01-01
Supplement: c8ra03504k1.pdf [file c8ra03504k1.pdf]

## Enhanced photoluminescence stability of CdS nanocrystals through a zinc acetate reagent†

M. Banski,<sup>a</sup> M. Chrzanowski,<sup>a</sup> G. Zatoryb,<sup>a</sup> J. Misiewicz,<sup>a</sup> A. Podhorodecki,<sup>a</sup>

<sup>a</sup> Department of Experimental Physics, Wrocław University of Science and Technology, Wybrzeże Wyspiańskiego 27, 50-370 Wrocław, Poland.

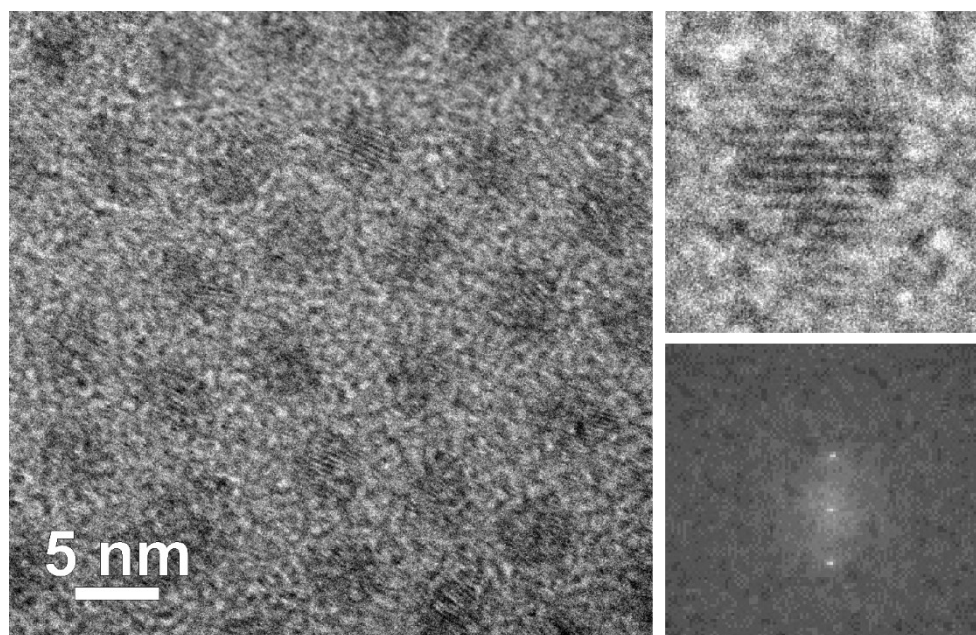

**Fig. S1.** HR-TEM images and electron diffraction of CdS:Zn NCs (0.2 mmol of Zn precursor).

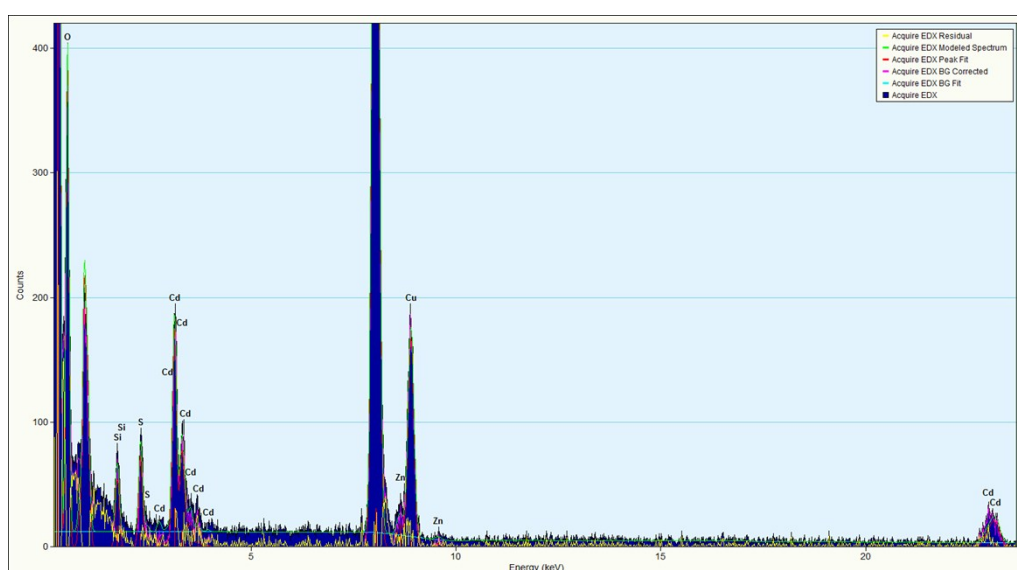

**Fig. S2.** EDX of CdS:Zn synthesized with 0.2 mmol of Zn(OAc)<sub>2</sub>.

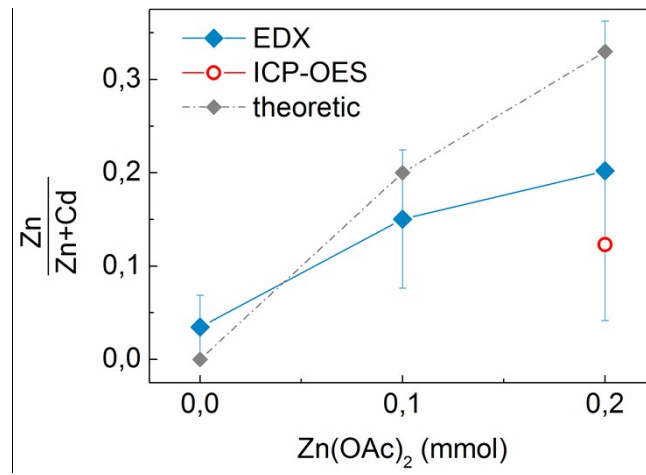

**Fig. S3.** Molar ratio of zinc to total cations of CdS:Zn nanocrystals determined from EDX spectra and ICP-OES in a function of  $Zn(OAc)_2$  dose.

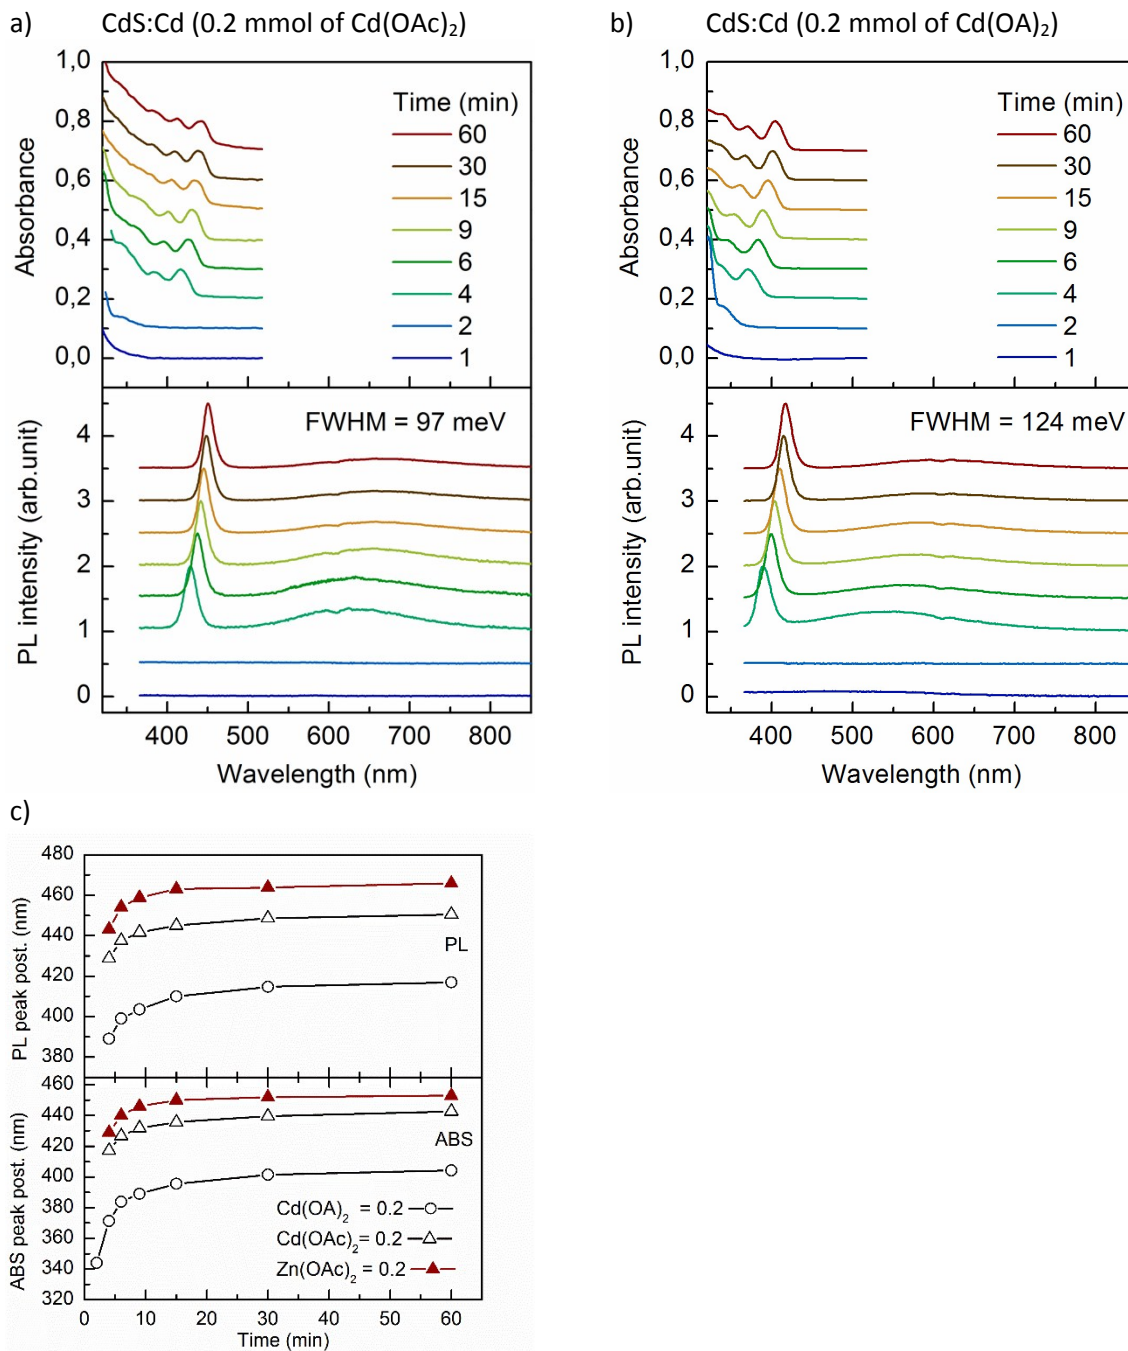

**Fig. S4.** ABS and PL spectra of CdS NCs synthesized with (a) 0.2 mmol Cd(OAc)<sub>2</sub> and (b) 0.2 mmol Cd(OA)<sub>2</sub>. (c) Positions of the first exciton transition of above samples determined from ABS and PL spectra in a function of synthesis time compared to results of CdS NCs with 0.2 mmol Zn(OAc)<sub>2</sub> addition.

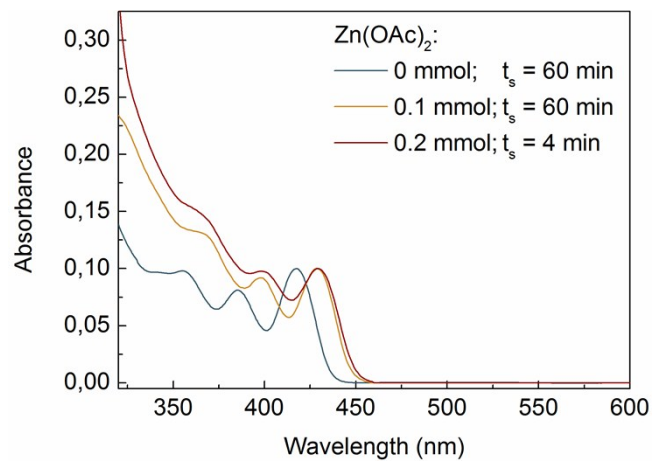

**Fig. S5.** ABS spectra of selected NCs samples having similar size. A decrease of ABS bands separation due to increase of Zn(OAc)<sub>2</sub> concentration is visible.
